# Supplementary material
Source: PubMed Central journal article supplement (PMC2886525)
Supplement: 00033.2010_1.pdf [file 00033.2010_1.pdf]

## Supplemental Figures

### Progressive Adaptation of Hepatic Ketogenesis in Mice Fed a High Fat Diet

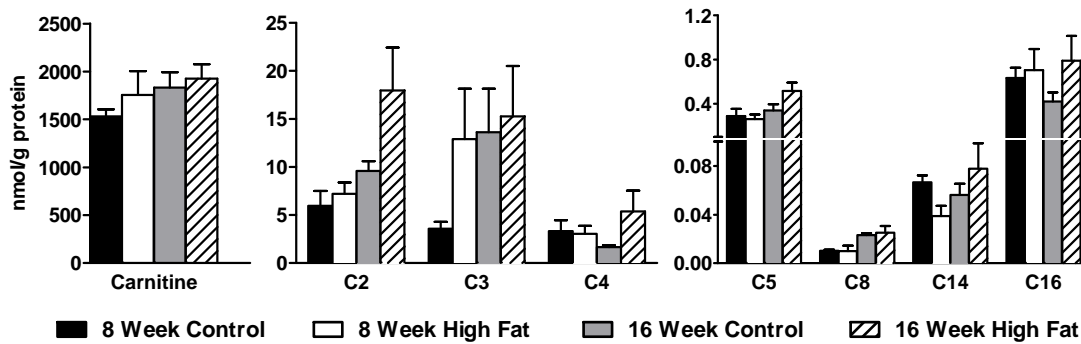

**Supplementary Figure 1:** Free carnitine and Acylcarnitine profiles in mice fed a synthetic control diet (10% fat calories) versus a high fat diet (60% fat calories) diet for either 8 or 16 weeks. Data are presented as means  $\pm$  SE of 6 to 10 mice. Acetylcarnitine (C2), Propionylcarnitine (C3), Butyrylcarnitine (C4), Isovalerylcarnitine (C5), Octanoylcarnitine (C8), Myristoylcarnitine (C14), Palmitoylcarnitine (C16).

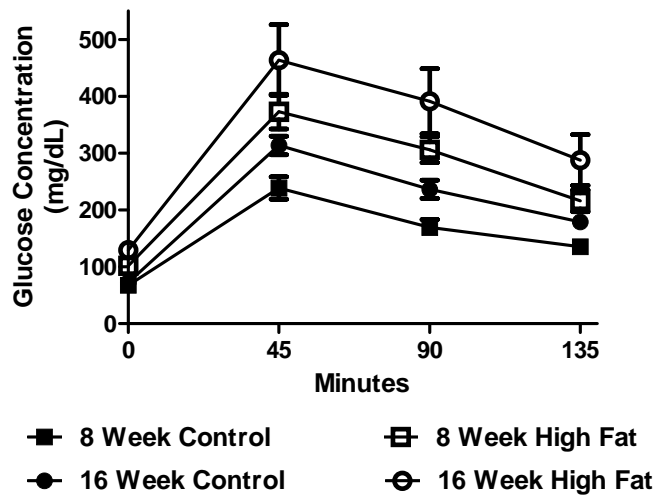

**Supplementary Figure 2:** Glucose concentrations in response to an intra-peritoneal glucose (2 g / kg bodyweight) challenge in mice maintained on control versus high fat diets for either 8 or 16 weeks indicates progressive glucose intolerance.
